# Supplementary material
Source: Springer Nature journal article supplement (https://www.springermedizin.de/resource/supplementary/12943_2010_793_MOESM7_ESM.pdf/9554850)

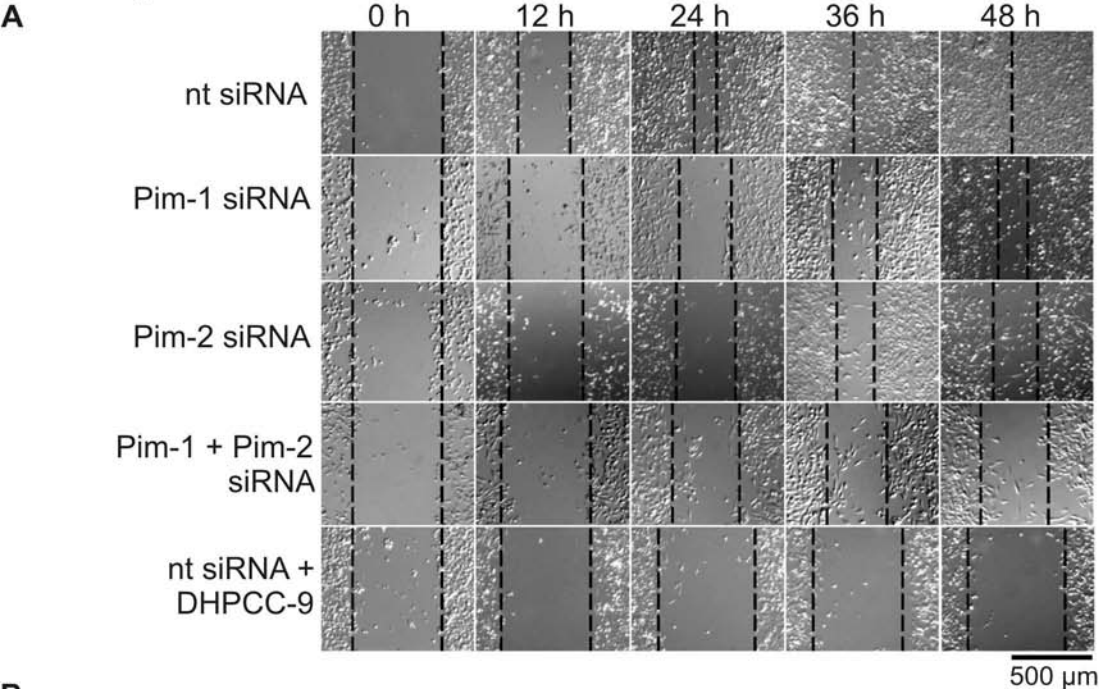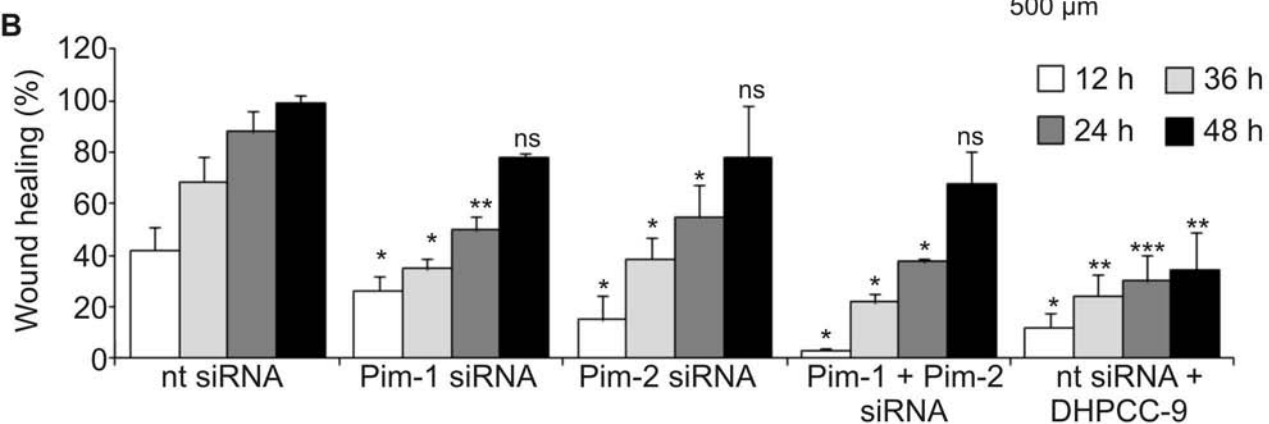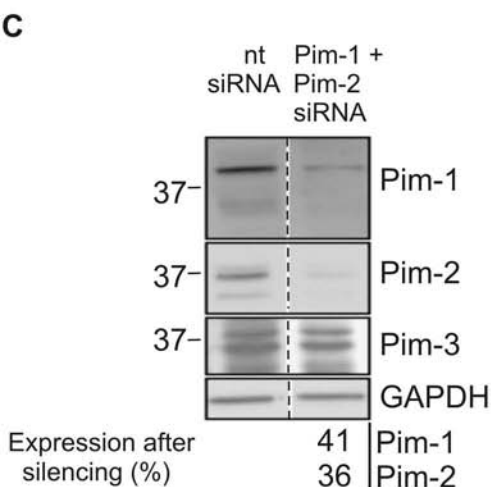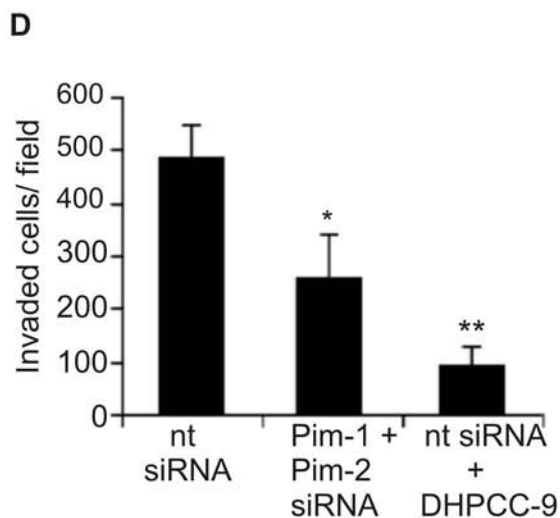

Supplement: MOESM7 [file 9554850]
